# Supplementary material
Source: MDPI journal article supplement (https://www.mdpi.com/2674-1024/3/1/2)
Supplement: s1 [file s1]

**Table S1.** Germination rate of chickpeas stored under standard (Cntrl) and controlled N<sub>2</sub> atmosphere (CA).

|       |        | Germination rate (%) |       |          |       |          |       |           |       |
|-------|--------|----------------------|-------|----------|-------|----------|-------|-----------|-------|
|       | Time 0 | 3 months             |       | 6 months |       | 9 months |       | 12 months |       |
| Cntrl |        | 89.50                | 90.17 | 92.00    | 89.00 | 91.50    | 90.50 | 76.50     | 75.67 |
|       |        | 90.50                |       | 88.50    |       | 90.00    |       | 73.50     |       |
|       |        | 90.50                |       | 86.50    |       | 90.00    |       | 77.00     |       |
| CA    | 94.90  | 91.00                | 90.17 | 91.00    | 90.50 | 87.00    | 89.50 | 70.50     | 69.17 |
|       |        | 89.00                |       | 93.00    |       | 90.00    |       | 67.50     |       |
|       |        | 90.50                |       | 87.50    |       | 91.50    |       | 69.50     |       |

**Table S2.** FA content in chickpeas stored under standard (Cntrl) and controlled N<sub>2</sub> atmosphere (CA). The values are expressed as means of 3 independent biological replicates (expressed as g/100 g of FW).

| FAs (g/100g)                      | Time 0 | 3 months |        | 6 months |        | 9 months |        | 12 months |        |
|-----------------------------------|--------|----------|--------|----------|--------|----------|--------|-----------|--------|
|                                   |        | Cntrl    | CA     | Cntrl    | CA     | Cntrl    | CA     | Cntrl     | CA     |
| Trans fatty acids                 | < 0.10 | < 0.10   | < 0.10 | < 0.10   | < 0.10 | < 0.10   | < 0.10 | < 0.1     | < 0.1  |
| $\omega$ -3                       | < 0.10 | < 0.10   | < 0.10 | < 0.10   | < 0.10 | < 0.10   | < 0.10 | < 0.1     | < 0.1  |
| Butyric acid                      | < 0.10 | < 0.01   | < 0.10 | < 0.01   | < 0.01 | < 0.01   | < 0.01 | < 0.01    | < 0.01 |
| Caproic acid                      | < 0.10 | < 0.01   | < 0.10 | < 0.01   | < 0.01 | < 0.01   | < 0.01 | < 0.01    | < 0.01 |
| Caprylic acid                     | < 0.10 | < 0.01   | < 0.10 | < 0.01   | < 0.01 | < 0.01   | < 0.01 | < 0.01    | < 0.01 |
| Capric Acid                       | < 0.10 | < 0.01   | < 0.10 | < 0.01   | < 0.01 | < 0.01   | < 0.01 | < 0.01    | < 0.01 |
| Lauric Acid                       | < 0.10 | < 0.01   | < 0.10 | < 0.01   | < 0.01 | < 0.01   | < 0.01 | < 0.01    | < 0.01 |
| Tridecanoic acid                  | < 0.10 | < 0.01   | < 0.10 | < 0.01   | < 0.01 | < 0.01   | < 0.01 | < 0.01    | < 0.01 |
| Myristic Acid                     | < 0.10 | < 0.01   | < 0.10 | < 0.01   | < 0.01 | < 0.01   | < 0.01 | < 0.01    | < 0.01 |
| Myristoleic acid                  | < 0.10 | < 0.01   | < 0.10 | < 0.01   | < 0.01 | < 0.01   | < 0.01 | < 0.01    | < 0.01 |
| Pentadecanoic acid                | < 0.10 | < 0.01   | < 0.10 | < 0.01   | < 0.01 | < 0.01   | < 0.01 | < 0.01    | < 0.01 |
| <i>cis</i> -10-Pentadecanoic acid | < 0.10 | < 0.01   | < 0.10 | < 0.01   | < 0.01 | < 0.01   | < 0.01 | < 0.01    | < 0.01 |
| Palmitoleic acid                  | 0.01   | < 0.01   | 0.01   | < 0.01   | < 0.01 | < 0.01   | < 0.01 | < 0.01    | < 0.01 |
| Heptadecanoic acid                | < 0.10 | < 0.01   | < 0.10 | < 0.01   | < 0.01 | < 0.01   | < 0.01 | < 0.01    | < 0.01 |
| <i>cis</i> -10-Heptadecenoic acid | < 0.10 | < 0.01   | < 0.10 | < 0.01   | < 0.01 | < 0.01   | < 0.01 | < 0.01    | < 0.01 |
| Elaidinic acid                    | < 0.10 | < 0.01   | < 0.10 | < 0.01   | < 0.01 | 0.04     | 0.04   | 0.04      | 0.04   |
| Linolelaidic acid                 | < 0.10 | < 0.01   | < 0.10 | < 0.01   | < 0.01 | < 0.01   | < 0.01 | < 0.01    | < 0.01 |
| $\gamma$ -Linolenic acid          | 0.05   | < 0.10   | < 0.10 | 0.05     | 0.06   | < 0.01   | < 0.01 | < 0.01    | < 0.01 |
| Arachic Acid                      | 0.02   | 0.01     | 0.02   | 0.01     | 0.01   | 0.02     | 0.01   | 0.02      | 0.02   |
| Eicosenoic acid                   | < 0.01 | < 0.01   | 0.017  | < 0.01   | < 0.01 | 0.01     | 0.02   | 0.01      | 0.02   |
| Eneicosanoic acid                 | < 0.10 | < 0.01   | < 0.10 | < 0.01   | < 0.01 | < 0.01   | < 0.01 | < 0.01    | < 0.01 |
| Eicosadienoic acid                | < 0.10 | < 0.01   | < 0.10 | < 0.01   | < 0.01 | < 0.01   | < 0.01 | < 0.01    | < 0.01 |
| Eicosatrienoic acid               | < 0.10 | < 0.01   | < 0.10 | < 0.01   | < 0.01 | < 0.01   | < 0.01 | < 0.01    | < 0.01 |
| Behenic Acid                      | 0.01   | 0.01     | 0.01   | 0.01     | 0.01   | < 0.01   | < 0.01 | < 0.01    | < 0.01 |
| Dihomo- $\gamma$ -Linolenic Acid  | < 0.10 | < 0.01   | < 0.10 | < 0.01   | < 0.01 | < 0.01   | < 0.01 | < 0.01    | < 0.01 |
| Arachidonic Acid                  | < 0.10 | < 0.01   | < 0.10 | < 0.01   | < 0.01 | < 0.01   | < 0.01 | < 0.01    | < 0.01 |
| Erucic acid                       | < 0.10 | < 0.01   | < 0.10 | < 0.01   | < 0.01 | < 0.01   | < 0.01 | < 0.01    | < 0.01 |
| Tricosanoic acid                  | < 0.10 | < 0.01   | < 0.10 | < 0.01   | < 0.01 | < 0.01   | < 0.01 | < 0.01    | < 0.01 |
| Docosadienoic acid                | < 0.10 | < 0.01   | < 0.10 | < 0.01   | < 0.01 | < 0.01   | < 0.01 | < 0.01    | < 0.01 |
| Eicosapentaenoic acid             | < 0.10 | < 0.01   | < 0.10 | < 0.01   | 0.01   | < 0.01   | < 0.01 | < 0.01    | < 0.01 |
| Lignoceric acid                   | < 0.10 | < 0.01   | < 0.10 | < 0.01   | < 0.01 | < 0.01   | < 0.01 | < 0.01    | < 0.01 |
| Nervonic Acid                     | < 0.10 | < 0.01   | < 0.10 | < 0.01   | < 0.01 | < 0.01   | < 0.01 | < 0.01    | < 0.01 |
| Docosahexaenoic acid              | < 0.10 | < 0.01   | < 0.10 | < 0.01   | < 0.01 | < 0.01   | < 0.01 | < 0.01    | < 0.01 |

**Table S3.** Content of the most abundant secondary metabolites in chickpeas stored under standard (Cntrl) and controlled N<sub>2</sub> atmosphere (CA), expressed as mg/100 g  $\pm$  standard deviation (SD). Asterisks denote statistically significant values ( $p \leq 0.05$ ) at the Student's t-test.

| Secondary metabolites (mg/g)        | Cntrl             | CA                 |
|-------------------------------------|-------------------|--------------------|
| Quinic acid                         | 0.160 $\pm$ 0.002 | 0.160 $\pm$ 0.003  |
| Indolebutyric acid MW 204           | 0.240 $\pm$ 0.001 | 0.266 $\pm$ 0.005* |
| Indoleacetic acid derivative MW 246 | 0.099 $\pm$ 0.002 | 0.101 $\pm$ 0.001  |
| Indoleacetic acid derivative        | 0.005 $\pm$ 0.001 | 0.005 $\pm$ 0.001  |
| Indoleacetic acid derivates         | 0.344 $\pm$ 0.002 | 0.372 $\pm$ 0.003* |
| Compound MW 432                     | 0.225 $\pm$ 0.004 | 0.241 $\pm$ 0.006* |
| Compound MW 282                     | 0.010 $\pm$ 0.001 | 0.011 $\pm$ 0.001  |
| Benzoic acid derivate               | 0.255 $\pm$ 0.005 | 0.275 $\pm$ 0.009* |
| Biochanin a glucoside               | 0.010 $\pm$ 0.001 | 0.010 $\pm$ 0.001  |
| Biochanin a derivative              | 0.004 $\pm$ 0.001 | 0.004 $\pm$ 0.001  |
| Biochanin a                         | 0.005 $\pm$ 0.001 | 0.005 $\pm$ 0.001  |
| Biochanin derivate                  | 0.020 $\pm$ 0.003 | 0.019 $\pm$ 0.001  |
